# Supplementary material
Source: PubMed Central journal article supplement (PMC7234262)
Supplement: NIHMS1566766-supplement-Tables_S1_S2.pdf [file NIHMS1566766-supplement-Tables_S1_S2.pdf]

Table S1: Fixed effects of the linear mixed effect model for RTs: Beta coefficients (raw), confidence intervals of the beta coefficients (CI: lower and upper bound), standard errors (SE), t-values for each of the fixed effects in the linear mixed effect model.

|                               | $\beta_{raw}$ | CI               | SE     | t     |
|-------------------------------|---------------|------------------|--------|-------|
| Intercept                     | 809.66        | [631.16 988.16]  | 97.07  | 8.89  |
| Accuracy (correct vs. errors) | -120.20       | [-191.82 -48.59] | 36.54  | -3.29 |
| Group (hearing vs. deaf)      | 67.79         | [-163.71 299.29] | 118.11 | 0.57  |
| Accuracy x Group              | 27.90         | [-59.07 114.86]  | 44.37  | 0.63  |

Table S2: Fixed effects of the generalized mixed effect model for accuracy rates: Beta coefficients (raw), confidence intervals of the beta coefficients (CI: lower and upper bound), standard errors (SE), Wald Z-values, and associated p-values for each of the fixed effects in the linear mixed effect model.

|           | $\beta_{raw}$ | CI           | SE   | Wald Z | p-value |
|-----------|---------------|--------------|------|--------|---------|
| Intercept | 3.54          | [2.98 4.10]  | 0.29 | 12.41  | <.001   |
| Group     | -0.29         | [-0.88 0.30] | 0.30 | -0.95  | .341    |
